# Supplementary material for: Quantifiable stretching-induced fluorescence shifts of an elastically bendable and plastically twistable organic crystal
Source: Royal Society of Chemistry journal article supplement (doi:10.1039/d1sc03818d), 2021-01-01
Supplement: d1sc03818d1.pdf [file d1sc03818d1.pdf]

## Electronic Supplementary Information

### Quantifiable Stretching-Induced Fluorescence Shifts of an Elastically Bendable and Plastically Twistable Organic Crystal

*Qi Di, Zhanrui Zhang, Xu Yu, Baolei Tang, Houyu Zhang, Jiaqi Li and Hongyu Zhang\**

#### Contents

|                                                          |              |
|----------------------------------------------------------|--------------|
| <b>1. Synthesis and characterizations</b>                | <b>S2-4</b>  |
| <b>2. Photophysical properties</b>                       | <b>S4-5</b>  |
| <b>3. Thermal property</b>                               | <b>S6</b>    |
| <b>4. Strain of elastic and twisted-elastic crystals</b> | <b>S7</b>    |
| <b>5. Spectra test of a crystal in different parts</b>   | <b>S8</b>    |
| <b>6. Tensile tests</b>                                  | <b>S8-11</b> |
| <b>7. X-ray diffraction analysis</b>                     | <b>S11</b>   |
| <b>8. Tension sensing characteristic curve</b>           | <b>S12</b>   |
| <b>9. X-ray crystallographic analysis</b>                | <b>S13</b>   |
| <b>10. Theoretical calculation</b>                       | <b>S14</b>   |

## General information

All chemicals for syntheses were purchased from commercial sources. The solvents for syntheses were analytical-reagent grade without further purification.  $^1\text{H}$  and  $^{13}\text{C}\{^1\text{H}\}$  NMR spectra were measured on a Bruker Avance 500 MHz spectrometer with tetramethylsilane as the internal standard. UV-vis absorption spectra were recorded by a Shimadzu UV-2550 spectrophotometer. Stretching tests were carried out on the No. 5944 universal materials tester produced by American ITW group Engstrang Corporation. The emission spectra were recorded by a Shimadzu RF-5301 PC spectrometer or a Maya2000 Pro CCD spectrometer. Differential scanning calorimetric (DSC) measurements were performed on a TA DSC Q20 instrument.

## 1. Synthesis and characterizations

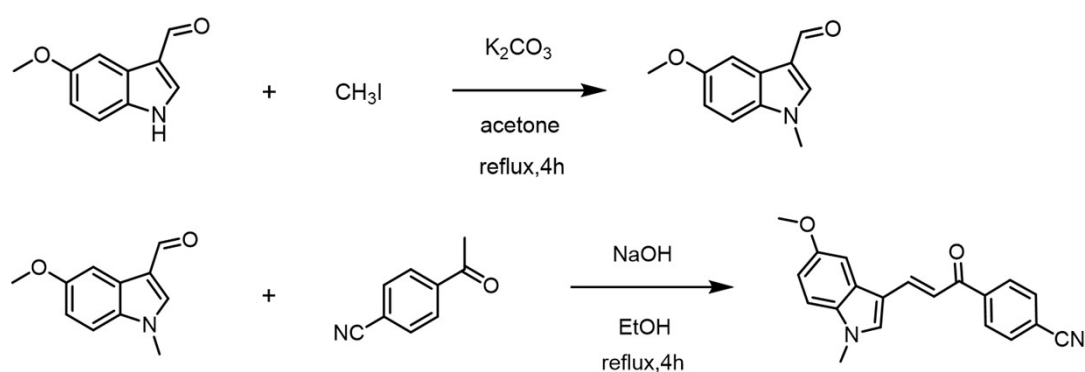

**Fig. S1** The synthetic procedure of target compound

5-Methoxy-1H-indole-3-carbaldehyde (1.75 g, 10 mmol) were dissolved in 50 mL acetone, and  $\text{K}_2\text{CO}_3$  (4.15 g, 30 mmol) was added. Then 1 mL  $\text{CH}_3\text{I}$  was injected into the solvent, the mixture was refluxed for 4 h. After cooling to room temperature,  $\text{K}_2\text{CO}_3$  was filtered and the solvent was removed by reduced pressure distillation. Then 80 mL ethanol was poured into the flask. 4-Acetylbenzonitrile (1.45 g, 10 mmol) and  $\text{NaOH}$  (0.08 g, 2 mmol) were added into the solvent, the mixture was refluxed for 4 h. The generated precipitate was filtered and washed with ethanol to give the crude product, which was purified by vacuum sublimation deposition to produce compound as a yellow solid (1.99 g, 63% yield).  $^1\text{H}$  NMR (500 MHz,  $\text{DMSO-d}_6$ )  $\delta$  8.26–8.19 (m, 2H), 8.13 (s, 1H), 8.07 (s, 1H), 8.03 (dd,  $J = 9.1, 2.8$  Hz, 1H), 7.58–7.43 (m, 3H), 6.96 (dd,  $J = 8.8, 2.4$  Hz, 2H), 3.88 (s, 3H), 3.84 (s, 3H).  $^{13}\text{C}$  NMR (126 MHz,  $\text{DMSO-d}_6$ )  $\delta$  188.18, 155.89, 142.61, 140.21, 137.47, 133.52, 133.16 (2C), 129.15 (2C), 127.02, 118.88, 114.82, 114.67, 112.64, 112.21, 112.04, 103.41, 56.11, 33.77.

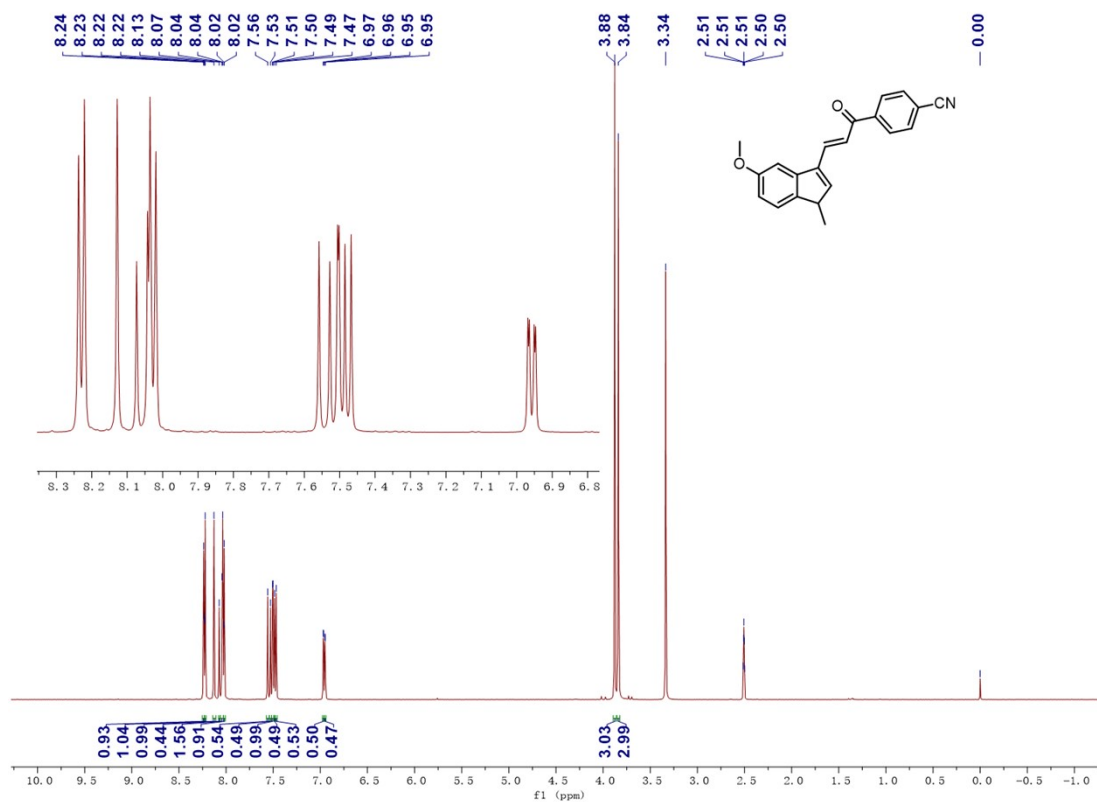

**Fig. S2**  $^1\text{H}$  NMR spectrum of compound (500 MHz, DMSO- $d_6$ ).

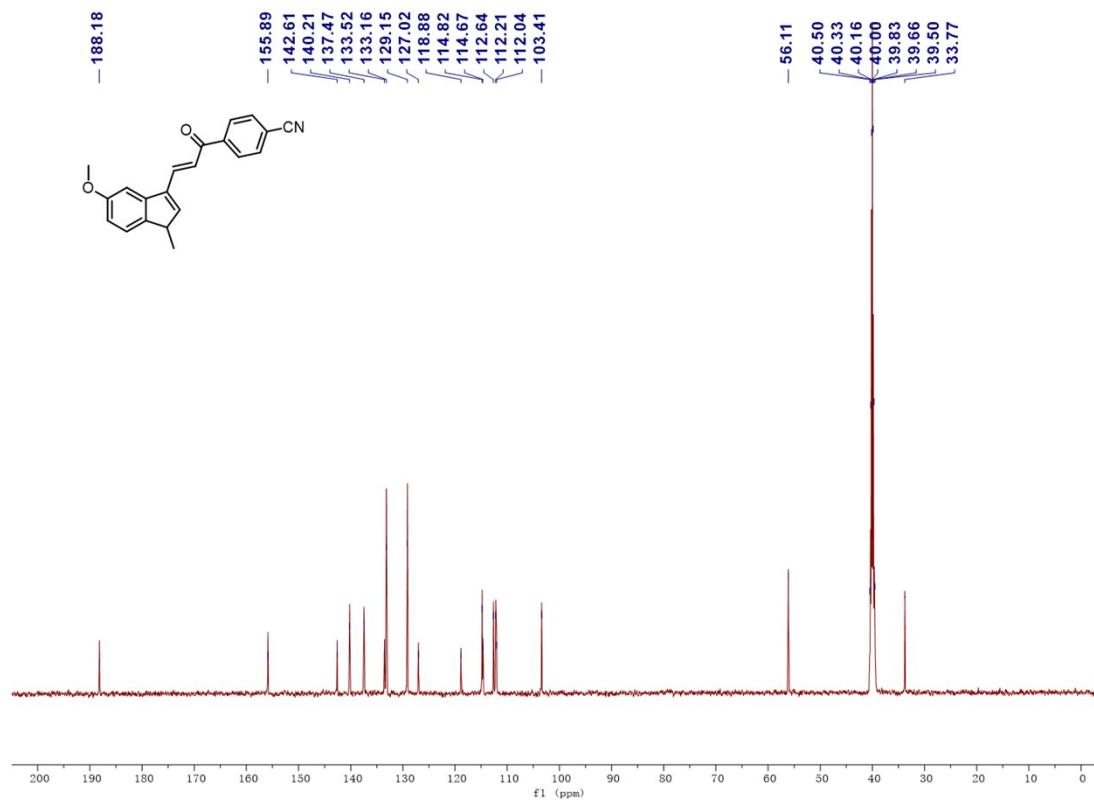

**Fig. S3**  $^{13}\text{C}\{^1\text{H}\}$  NMR spectrum of compound (126 MHz, DMSO- $d_6$ ).

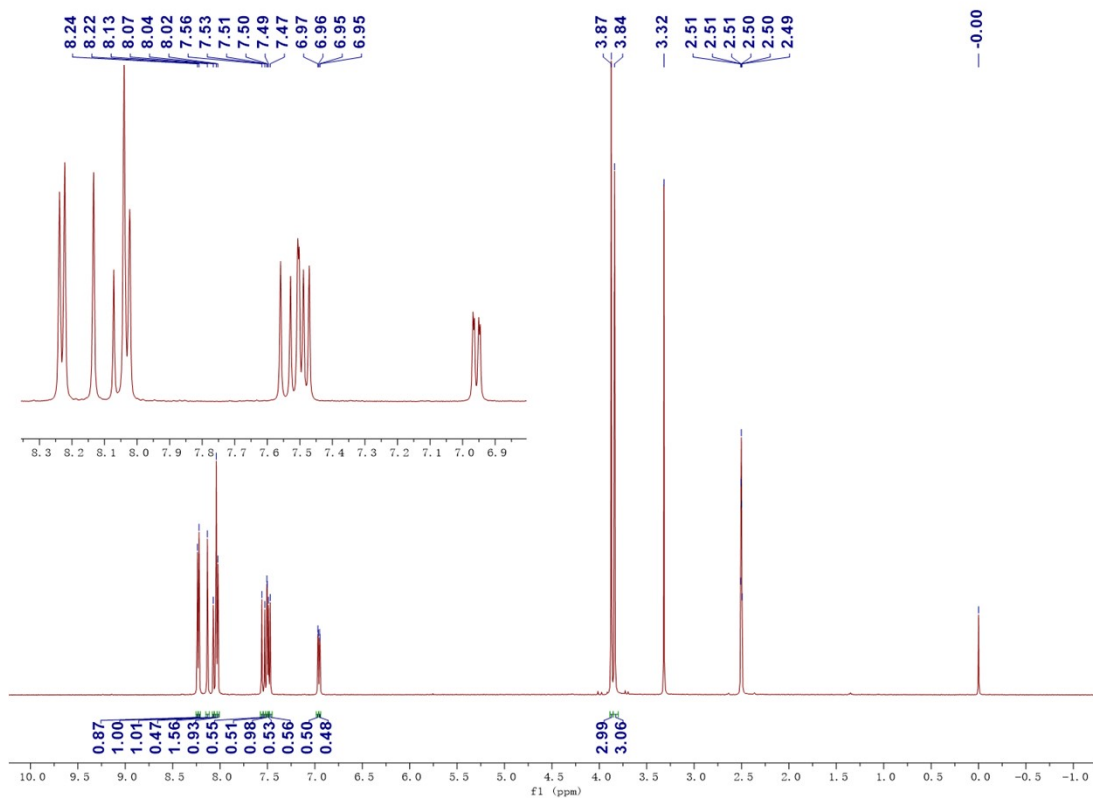

Fig. S4  $^1\text{H}$  NMR spectrum of compound after 365 nm irradiation (power: 16.7 mW/cm<sup>2</sup>) for 5 minutes (500 MHz, DMSO-d<sub>6</sub>).

## 2. Photophysical properties

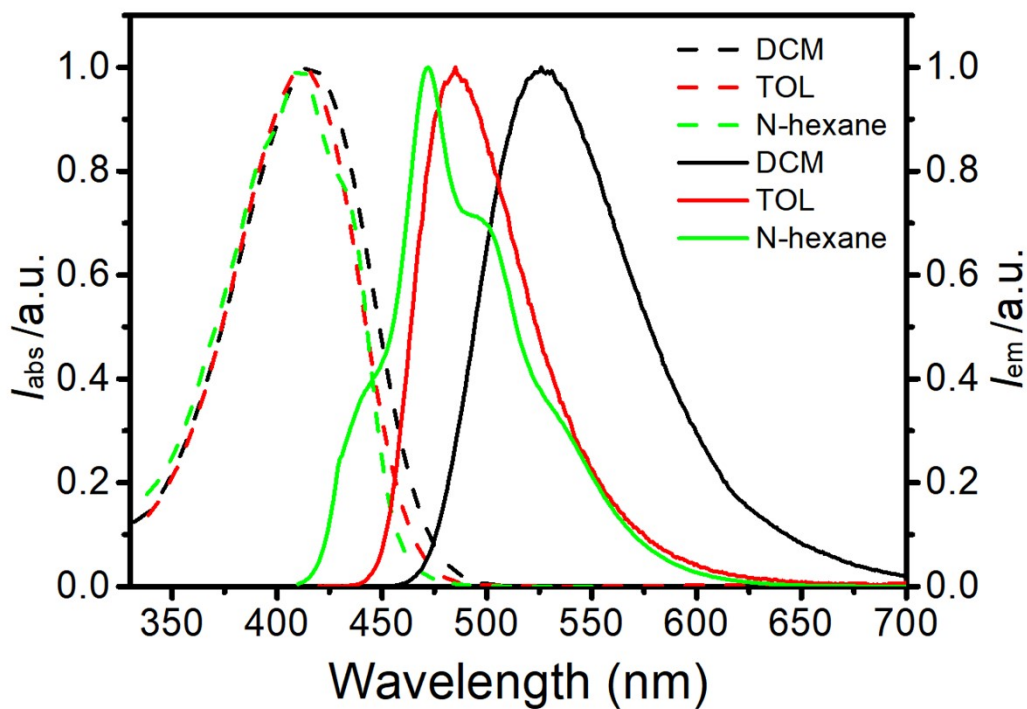

Fig. S5 Absorption and emission spectra of compound at different solvents.

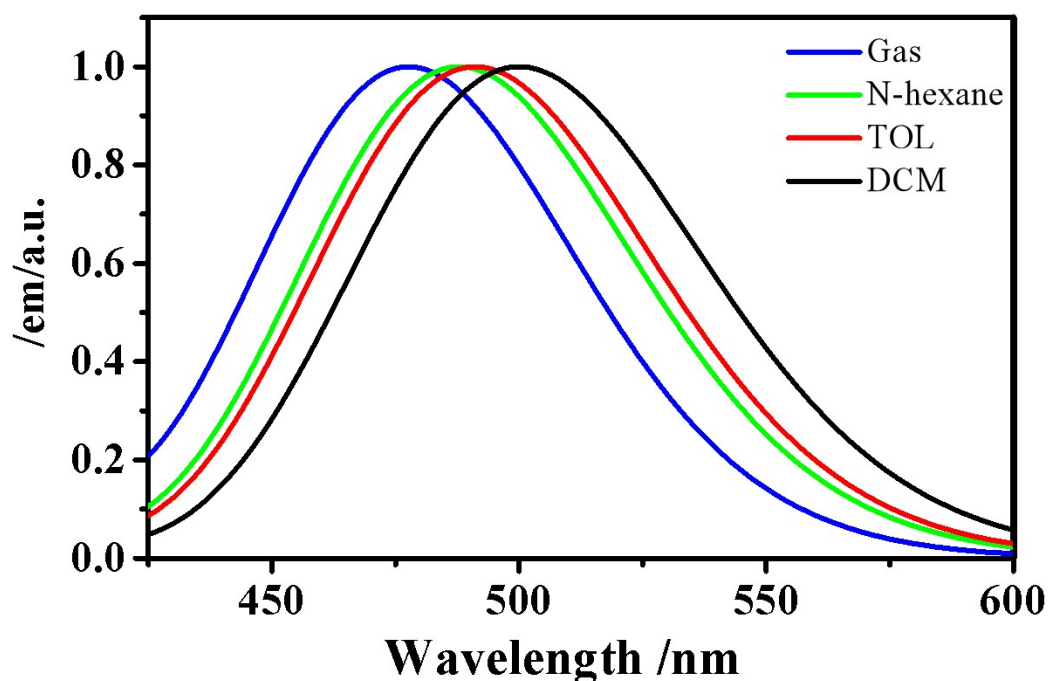

Fig. S6 Simulated emission spectra at different solvent.

|        | $\epsilon^a$ | State          | $\Delta E$ (eV) | $\lambda_{em}$<br>(nm) | Excitation                                |
|--------|--------------|----------------|-----------------|------------------------|-------------------------------------------|
| gas    | 0            | S <sub>1</sub> | 2.57            | 482                    | HOMO → LUMO (81%);<br>HOMO → LUMO+1 (6 %) |
| Hexane | 1.88         | S <sub>1</sub> | 2.52            | 492                    | HOMO → LUMO (84%);<br>HOMO → LUMO+1 (7 %) |
| TOL    | 2.37         | S <sub>1</sub> | 2.50            | 495                    | HOMO → LUMO (84%);<br>HOMO → LUMO+1 (7 %) |
| DCM    | 8.93         | S <sub>1</sub> | 2.46            | 504                    | HOMO → LUMO (86%);<br>HOMO → LUMO+1 (7 %) |

<sup>a</sup>:  $\epsilon$  is the dielectric coefficient of the solvent.

**Table S1.** Emissions and dominant orbital excitations obtained from TD-DFT calculations in different solvent and gas phase.

**Experimental section:** the TD-DFT calculations were performed to investigate the emission behavior of MMIAB at different solvent with a polarizable continuum model (PCM). The BMK functional with inclusion of 42% non-local Hartree Fock exchange and 6-31G (d, p) basis set were adopted to optimize the excited states. Geometry optimizations and emission spectra simulations were carried out using the Gaussian 09 package.

### 3. Thermal property

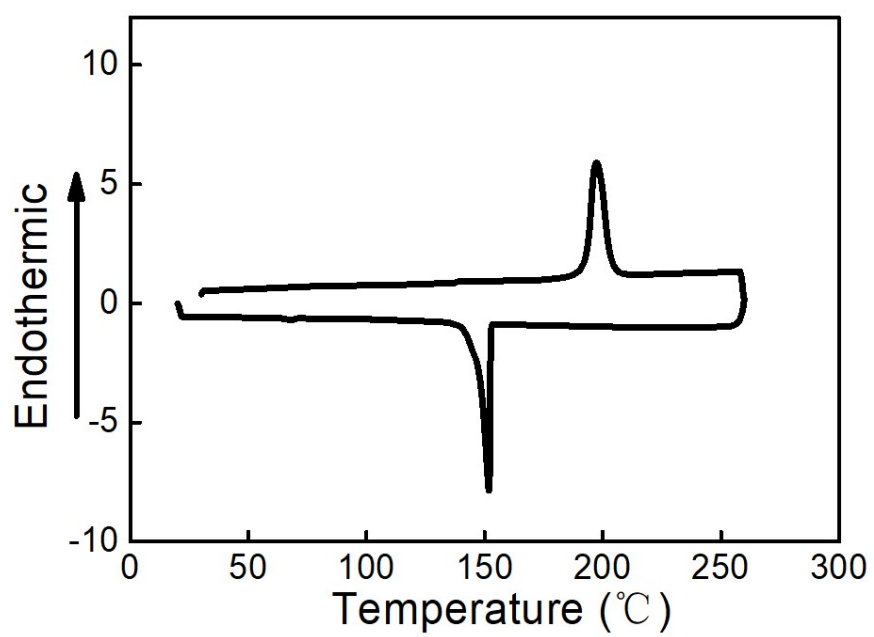

Fig. S7. DSC curve of the crystals.

#### 4. Strain of elastic and twisted-elastic crystals

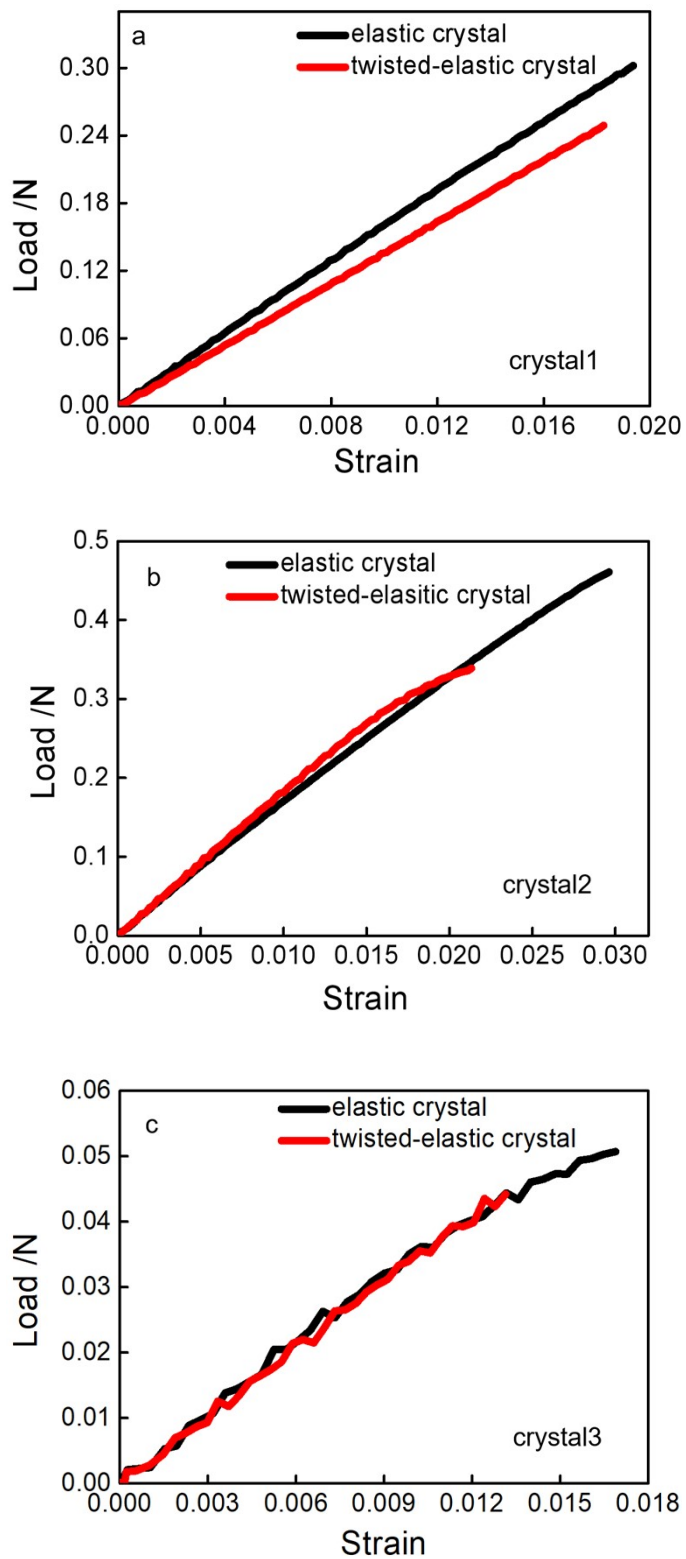

Fig. S8. Tensile tests of elastic and twisted-elastic parts of crystals.

## 5. Spectra test of a crystal in different parts

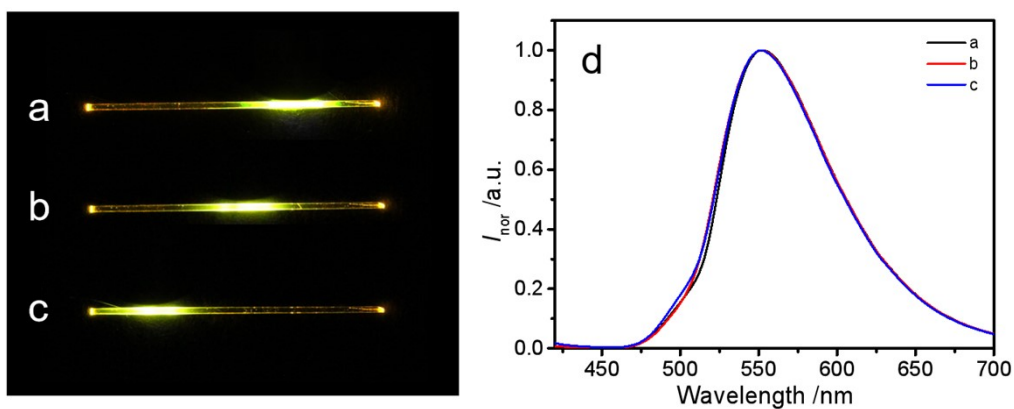

Fig. S9 Photos of different detecting points of a crystal and their emission spectra.

## 6. Tensile tests

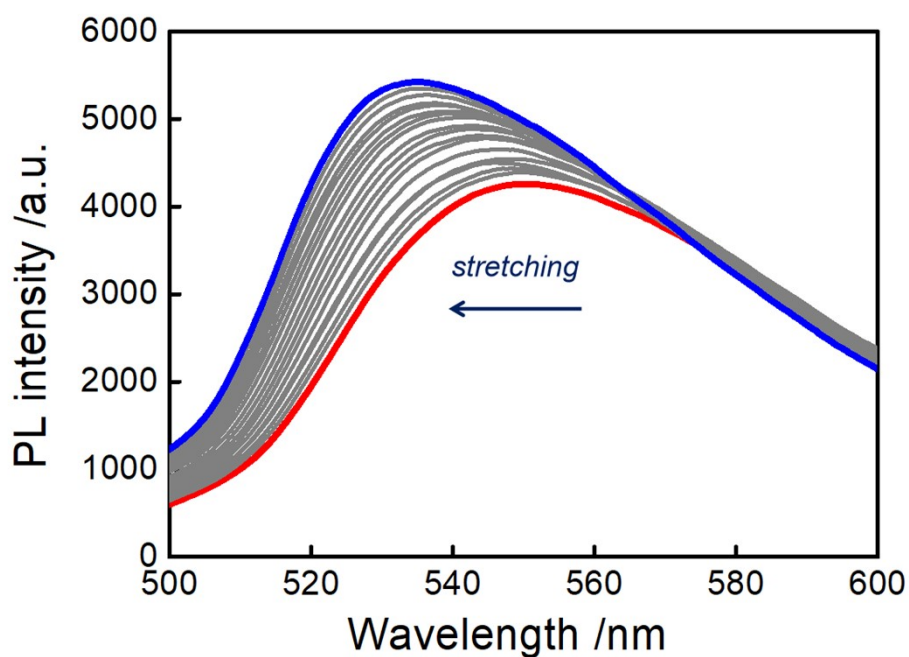

Fig. S10 The fluorescence intensity of one crystal under different strain.

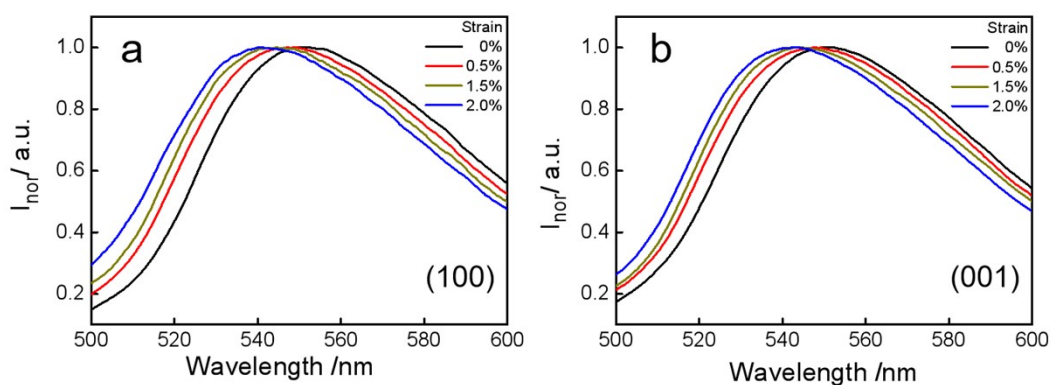



**Fig. S11** The emission spectra of different faces of one stretching crystal.

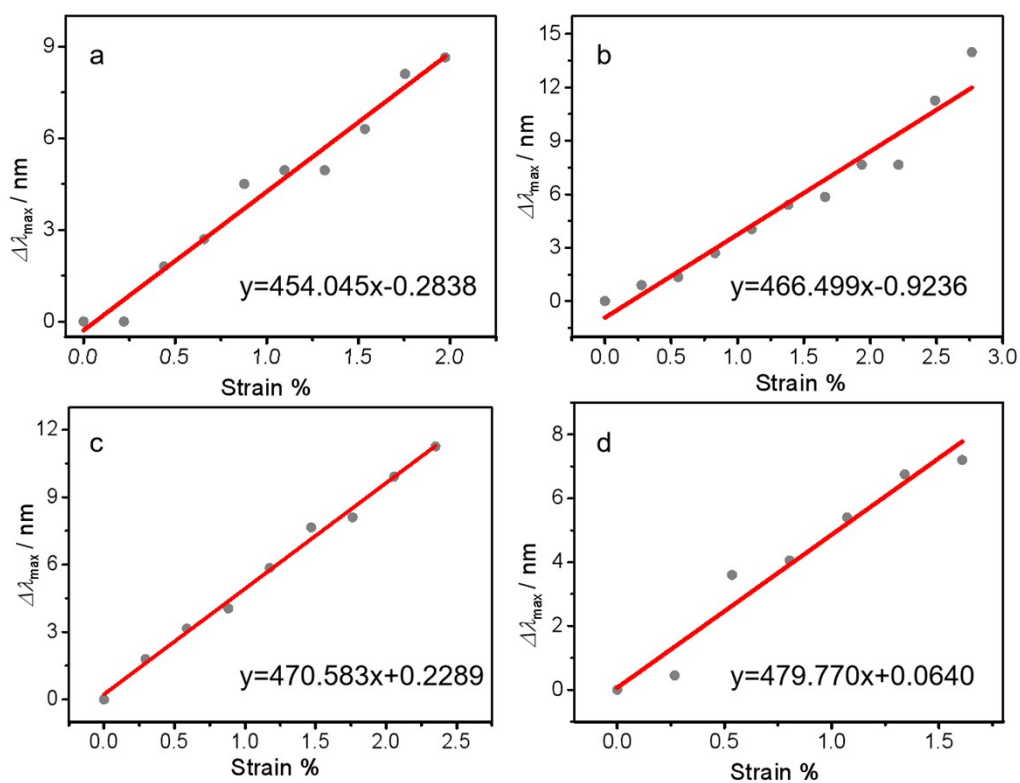

**Fig. S12** Wavelength changes-strain linear fit curves of four different crystals.

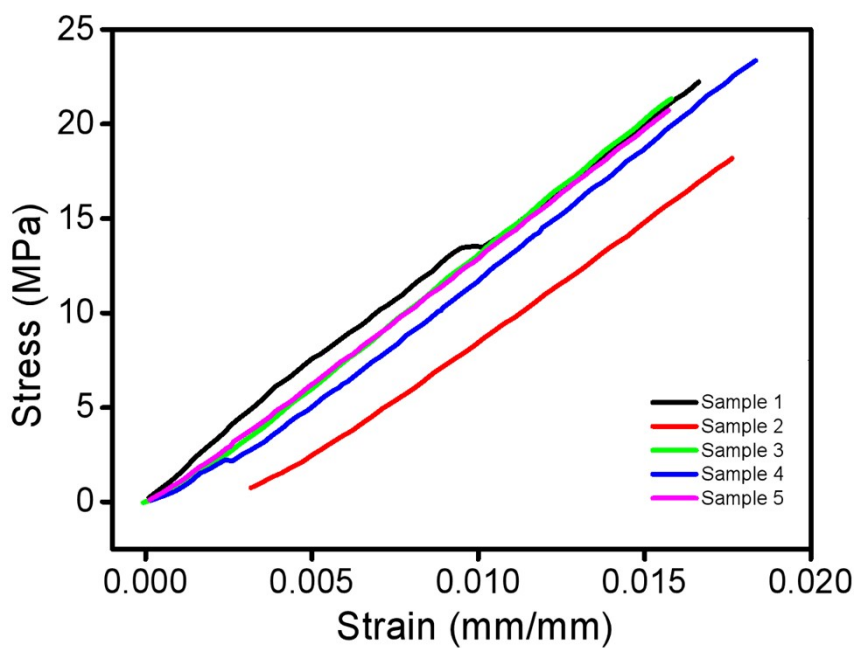

**Fig. S13** Stress-strain curves of five crystals in tensile test.

| Serial number | Modulus /GPa |
|---------------|--------------|
| 1             | 1.3          |
| 2             | 1.2          |
| 3             | 1.4          |
| 4             | 1.3          |
| 5             | 1.3          |

**Table S2.** The modulus of five crystals.

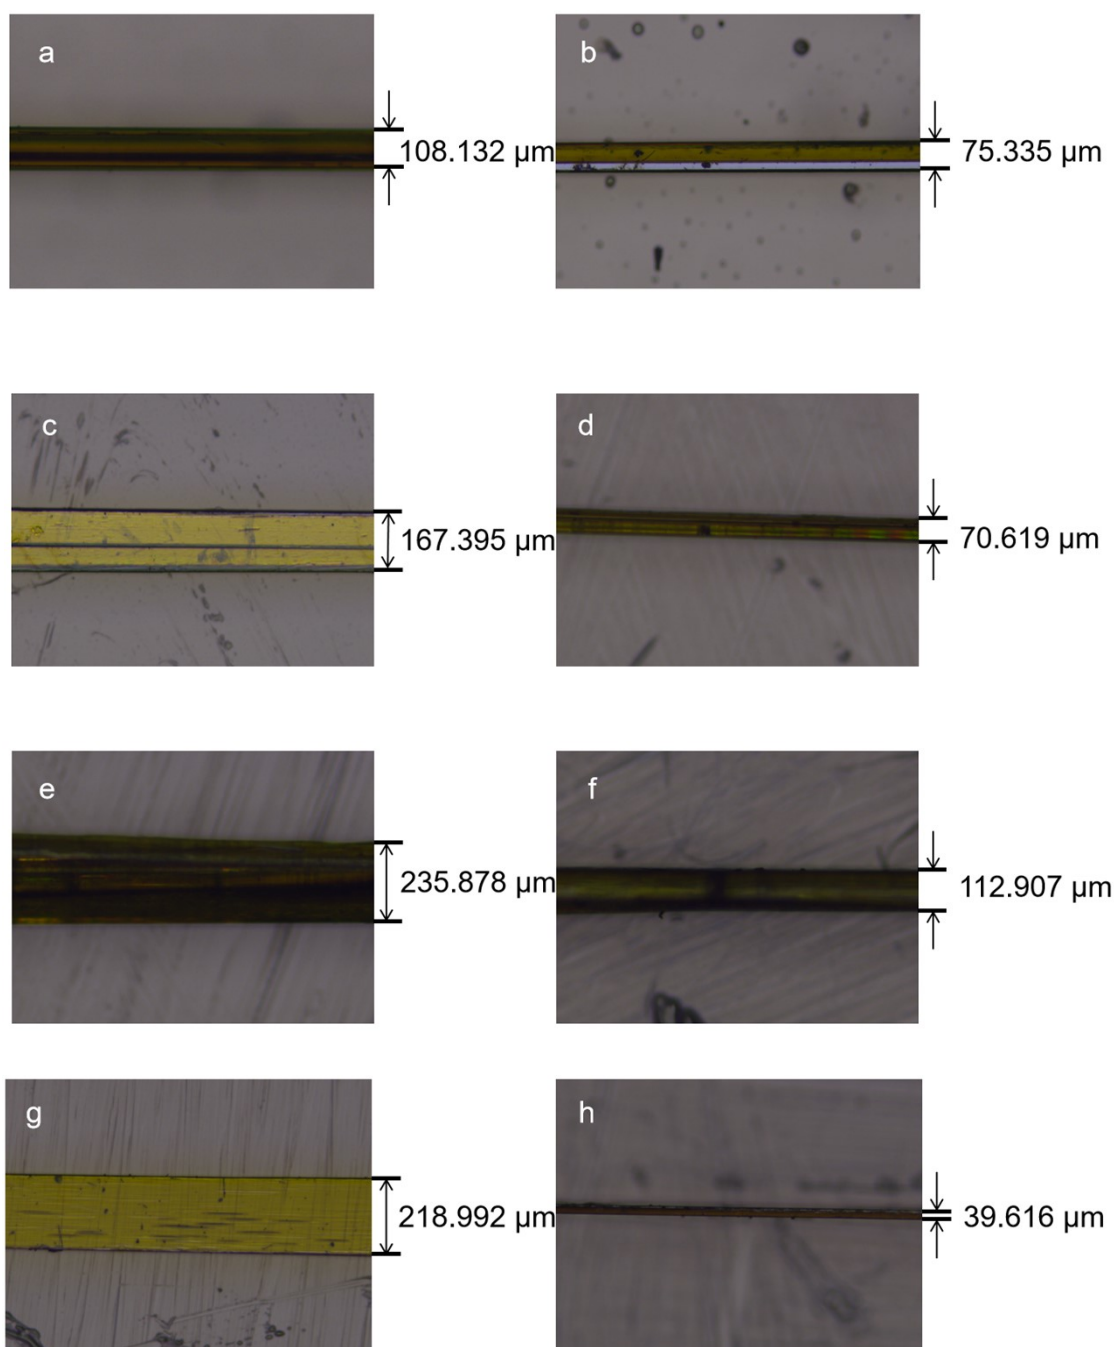

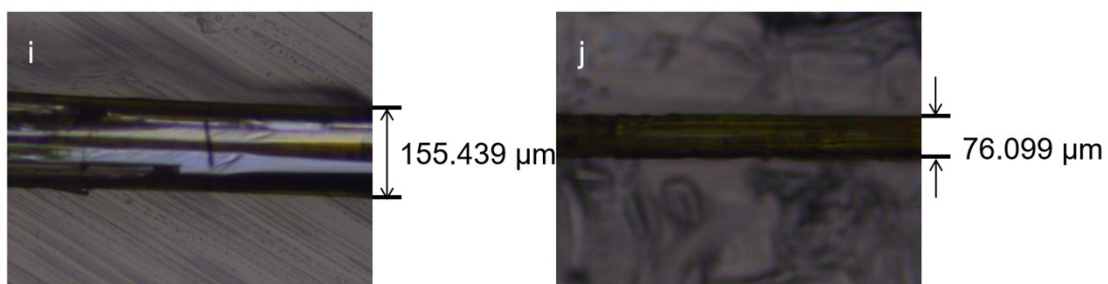

**Fig. S14** Microphotographs and sizes of five samples.

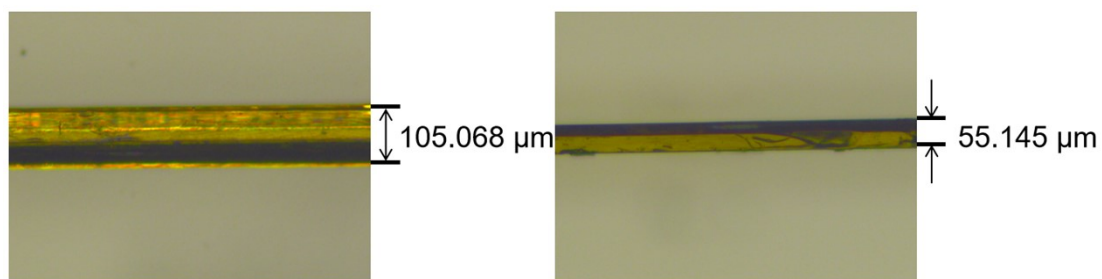

**Fig. S15** Microphotographs and size of blue-shifted 17 nm crystal.

## 7. X-ray diffraction analysis

Powder X-ray diffraction data of crystal were collected on a Rigaku SmartLab 3 diffractometer with  $\text{Cu}\cdot\text{K}\alpha$  radiation.

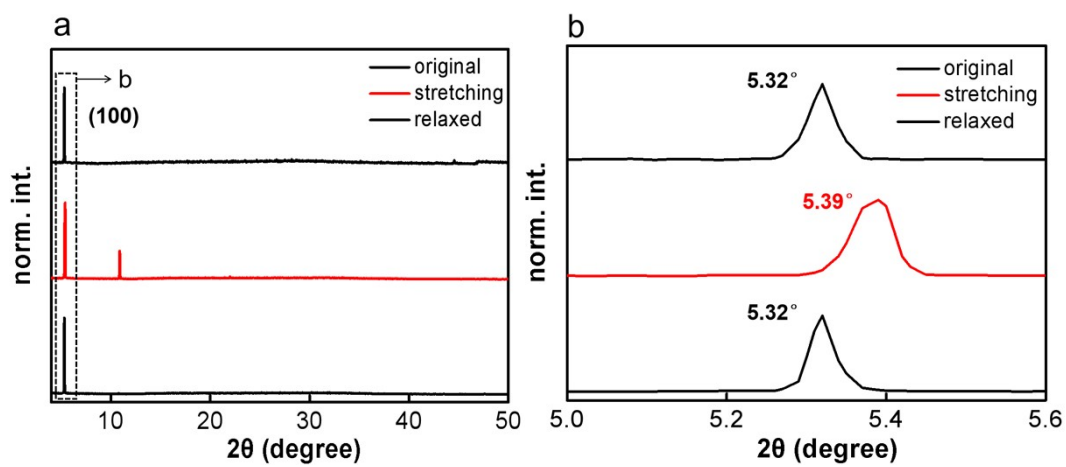

**Fig. S16** XRD patterns of the crystals in original, stretching and relaxed state.

## 8. Tension sensing characteristic curve

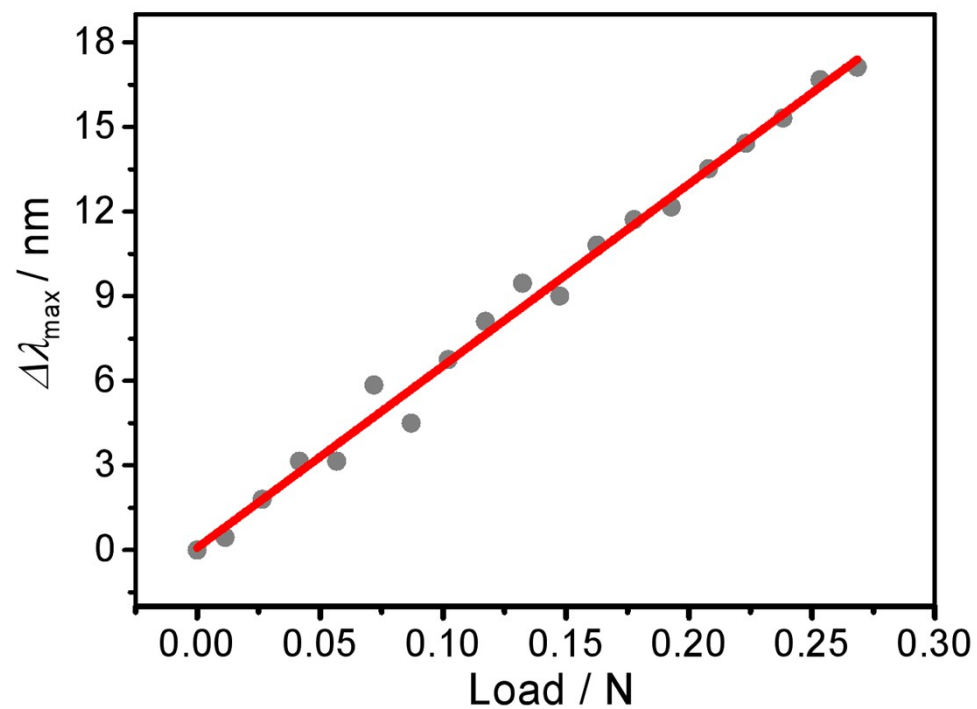

**Fig. S17** Tension sensing characteristic curve. The data was fitted by a function of  $y=a+bx$ , where  $a$  and  $b$  are 0.082 and 64.50, respectively.

## 9. X-ray crystallographic analysis

**Single crystal X-ray measurements.** Diffraction data of crystals were collected on a Rigaku RAXIS-PRID diffractometer. The structures were solved with direct methods using the Olex2 programs and refined with full-matrix least-squares on F2. Non-hydrogen atoms were refined anisotropically. The positions of hydrogen atoms were calculated and refined isotropically. The crystallographic information has been deposited at the Cambridge Crystallographic Data Centre (CCDC). CCDC number: 2106756

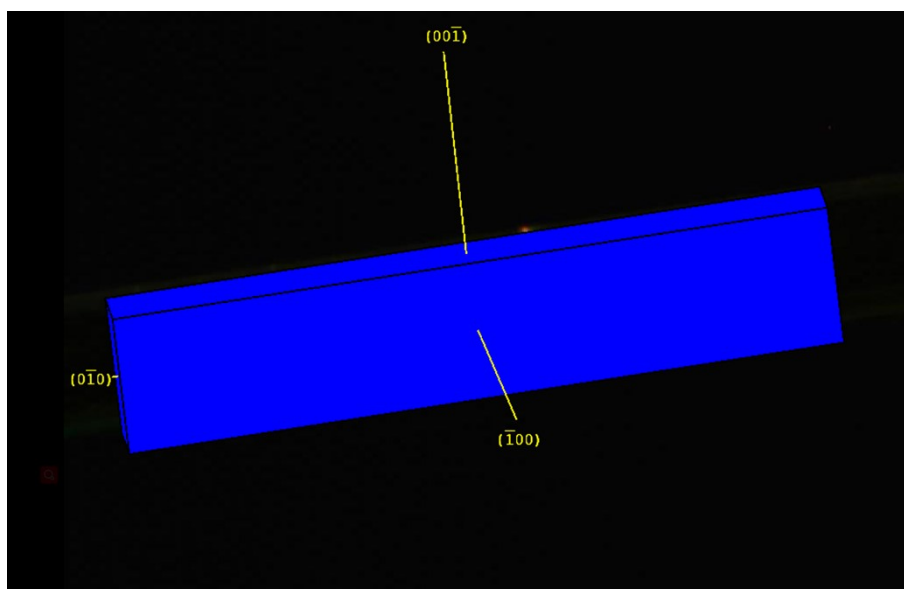

**Fig. S18** Growth morphology of crystal.

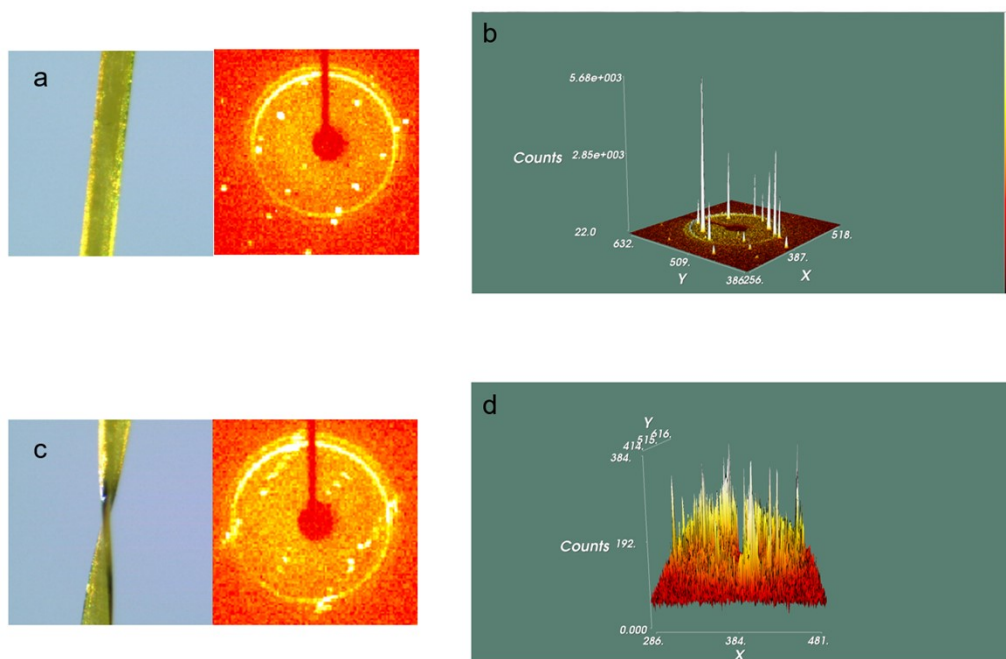

**Fig. S19** a) Photo and X-Ray diffraction patterns of crystal straight part. b) Diffraction peaks of straight part. c) Photo and X-Ray diffraction patterns of twist part. d) Diffraction peaks of twist part.

## 10. Theoretical calculation

**Experimental section.** theoretical calculations were performed by ORCA using CAM-B3LYP/def2-SV(P). With Grimme D3 dispersion correction without any optimization. The dimer was utilized as the model created by the initial crystal structure and dimerscan.

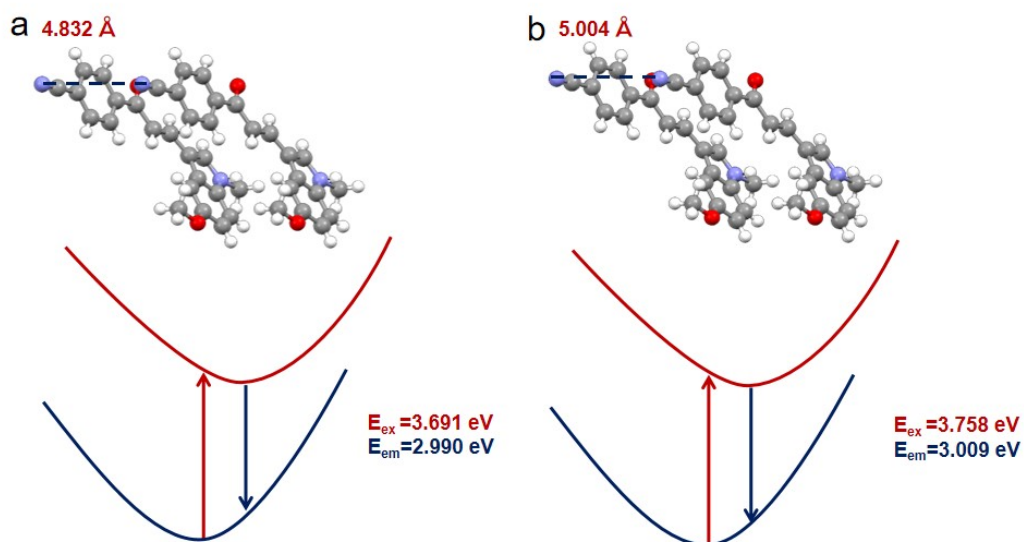

**Fig. S20** The calculated distance, excitation energy and emission energy in dimer of initial (a) and stretching (b) state.
